# Supplementary material for: Exploiting spatiotemporal regulation of FZD5 during neural patterning for efficient ventral midbrain specification
Source: PubMed Central journal article supplement (PMC10946437; doi:10.1242/dev.202545), 2024-03-04
Supplement: develop-151-202545-s1.pdf [file develop-151-202545-s1.pdf]

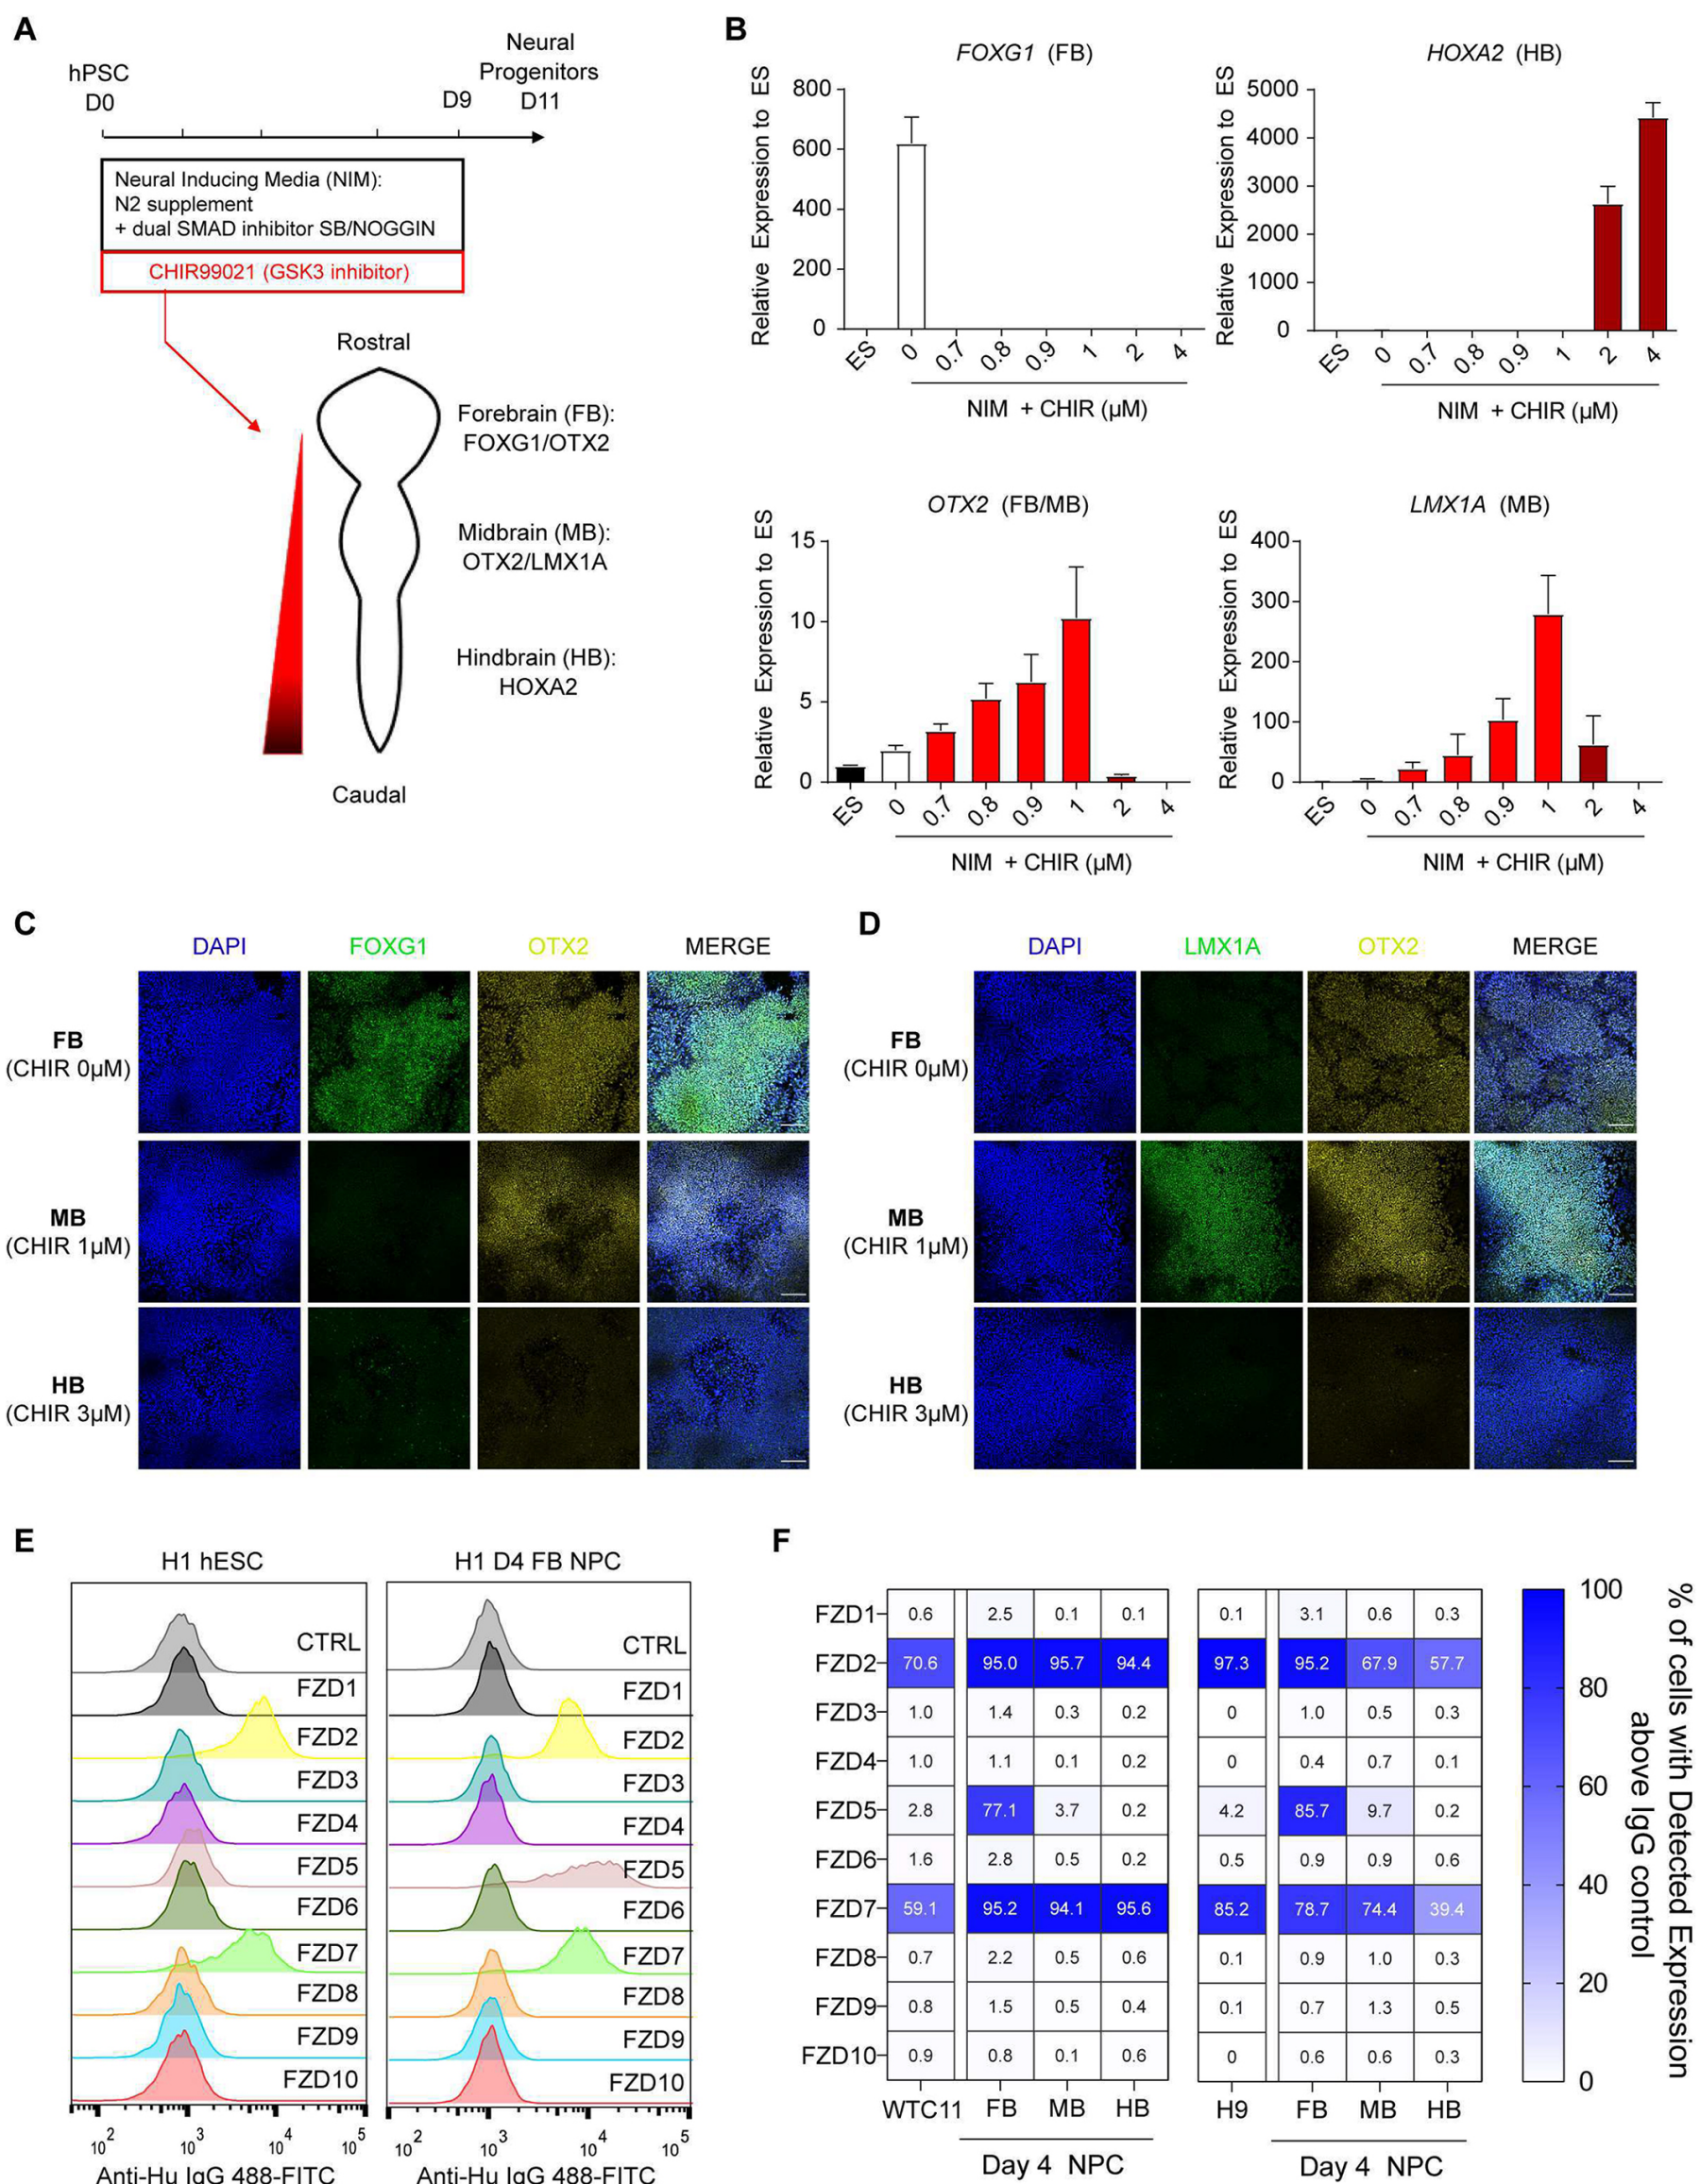

**Fig. S1. Related to Fig. 1.**

**A.** Overview of differentiation protocol of regional neural progenitors. **B.** Gene expression of regional specific markers was measured by qPCR at day 11 of differentiation treated with various concentration of CHIR99021 patterned from H1 hESC. The gene expression was normalized to the non-differentiated ES, Mean  $\pm$  s.d. of 3 technical replicates from 1 experiment. Representative of 3 independent experiments. **C-D.** Immunofluorescence staining of FOXG1/OTX2 (**C**) and LMX1A/OTX2 (**D**) in patterned neural progenitors at day 11. Representative of 3 independent experiments. Scale bar, 100  $\mu$ m. **E.** Histogram of flow cytometry staining of FZD receptors in H1 ES cells and Day 4 FB NPC. **F.** The percentages of each cell surface FZD expression in WTC11 (hiPSC) and differentiated day 4 regional NPCs, and H9 ESC and differentiated day 4 regional NPCs. Representation of 3 independent experiments.



**A**

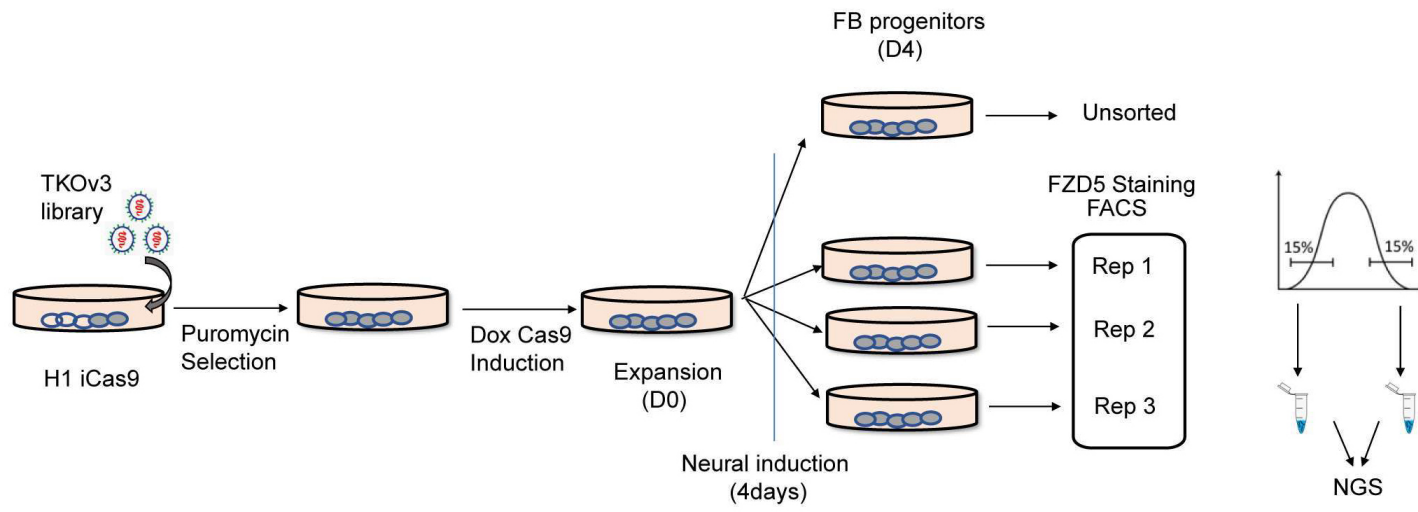

**B**

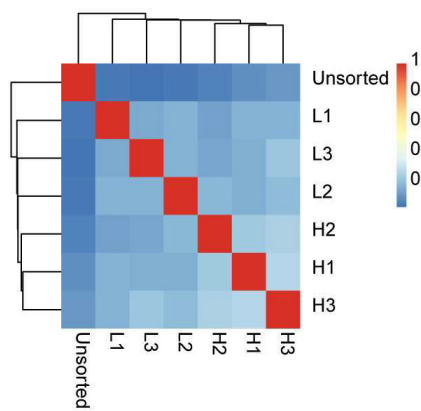

**C**

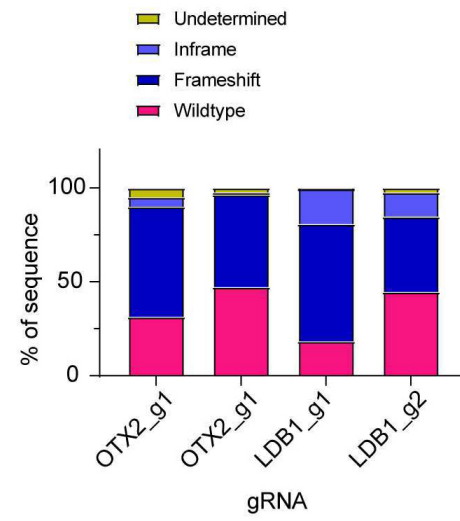

**D**

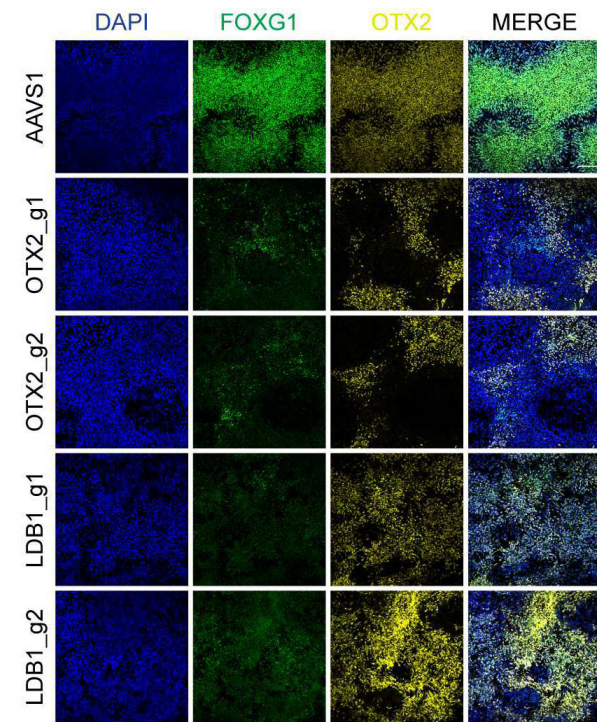

**Fig. S2. Related to Fig. 2.**

**A.** Schematic outlining the CRISPR screen in H1 -iCas9 cells. **B.** Pearson correlation analysis of the gRNA counts in each sample. L denotes the FZD5-low sorted population while H denotes FZD5-high sorted, and the numbers represent the replicates. **C.** KO efficiency of gRNAs targeting OTX2 and LDB1 cells as determined by TIDE sequencing analysis. **D.** Immunofluorescence staining of FOXG1 and OTX2 in day 11 FB patterned AAVS1-KO cells compared to OTX2-KO cells and LDB1-KO cells. Representative of 3 independent experiments. Scale bar, 100  $\mu$ m.

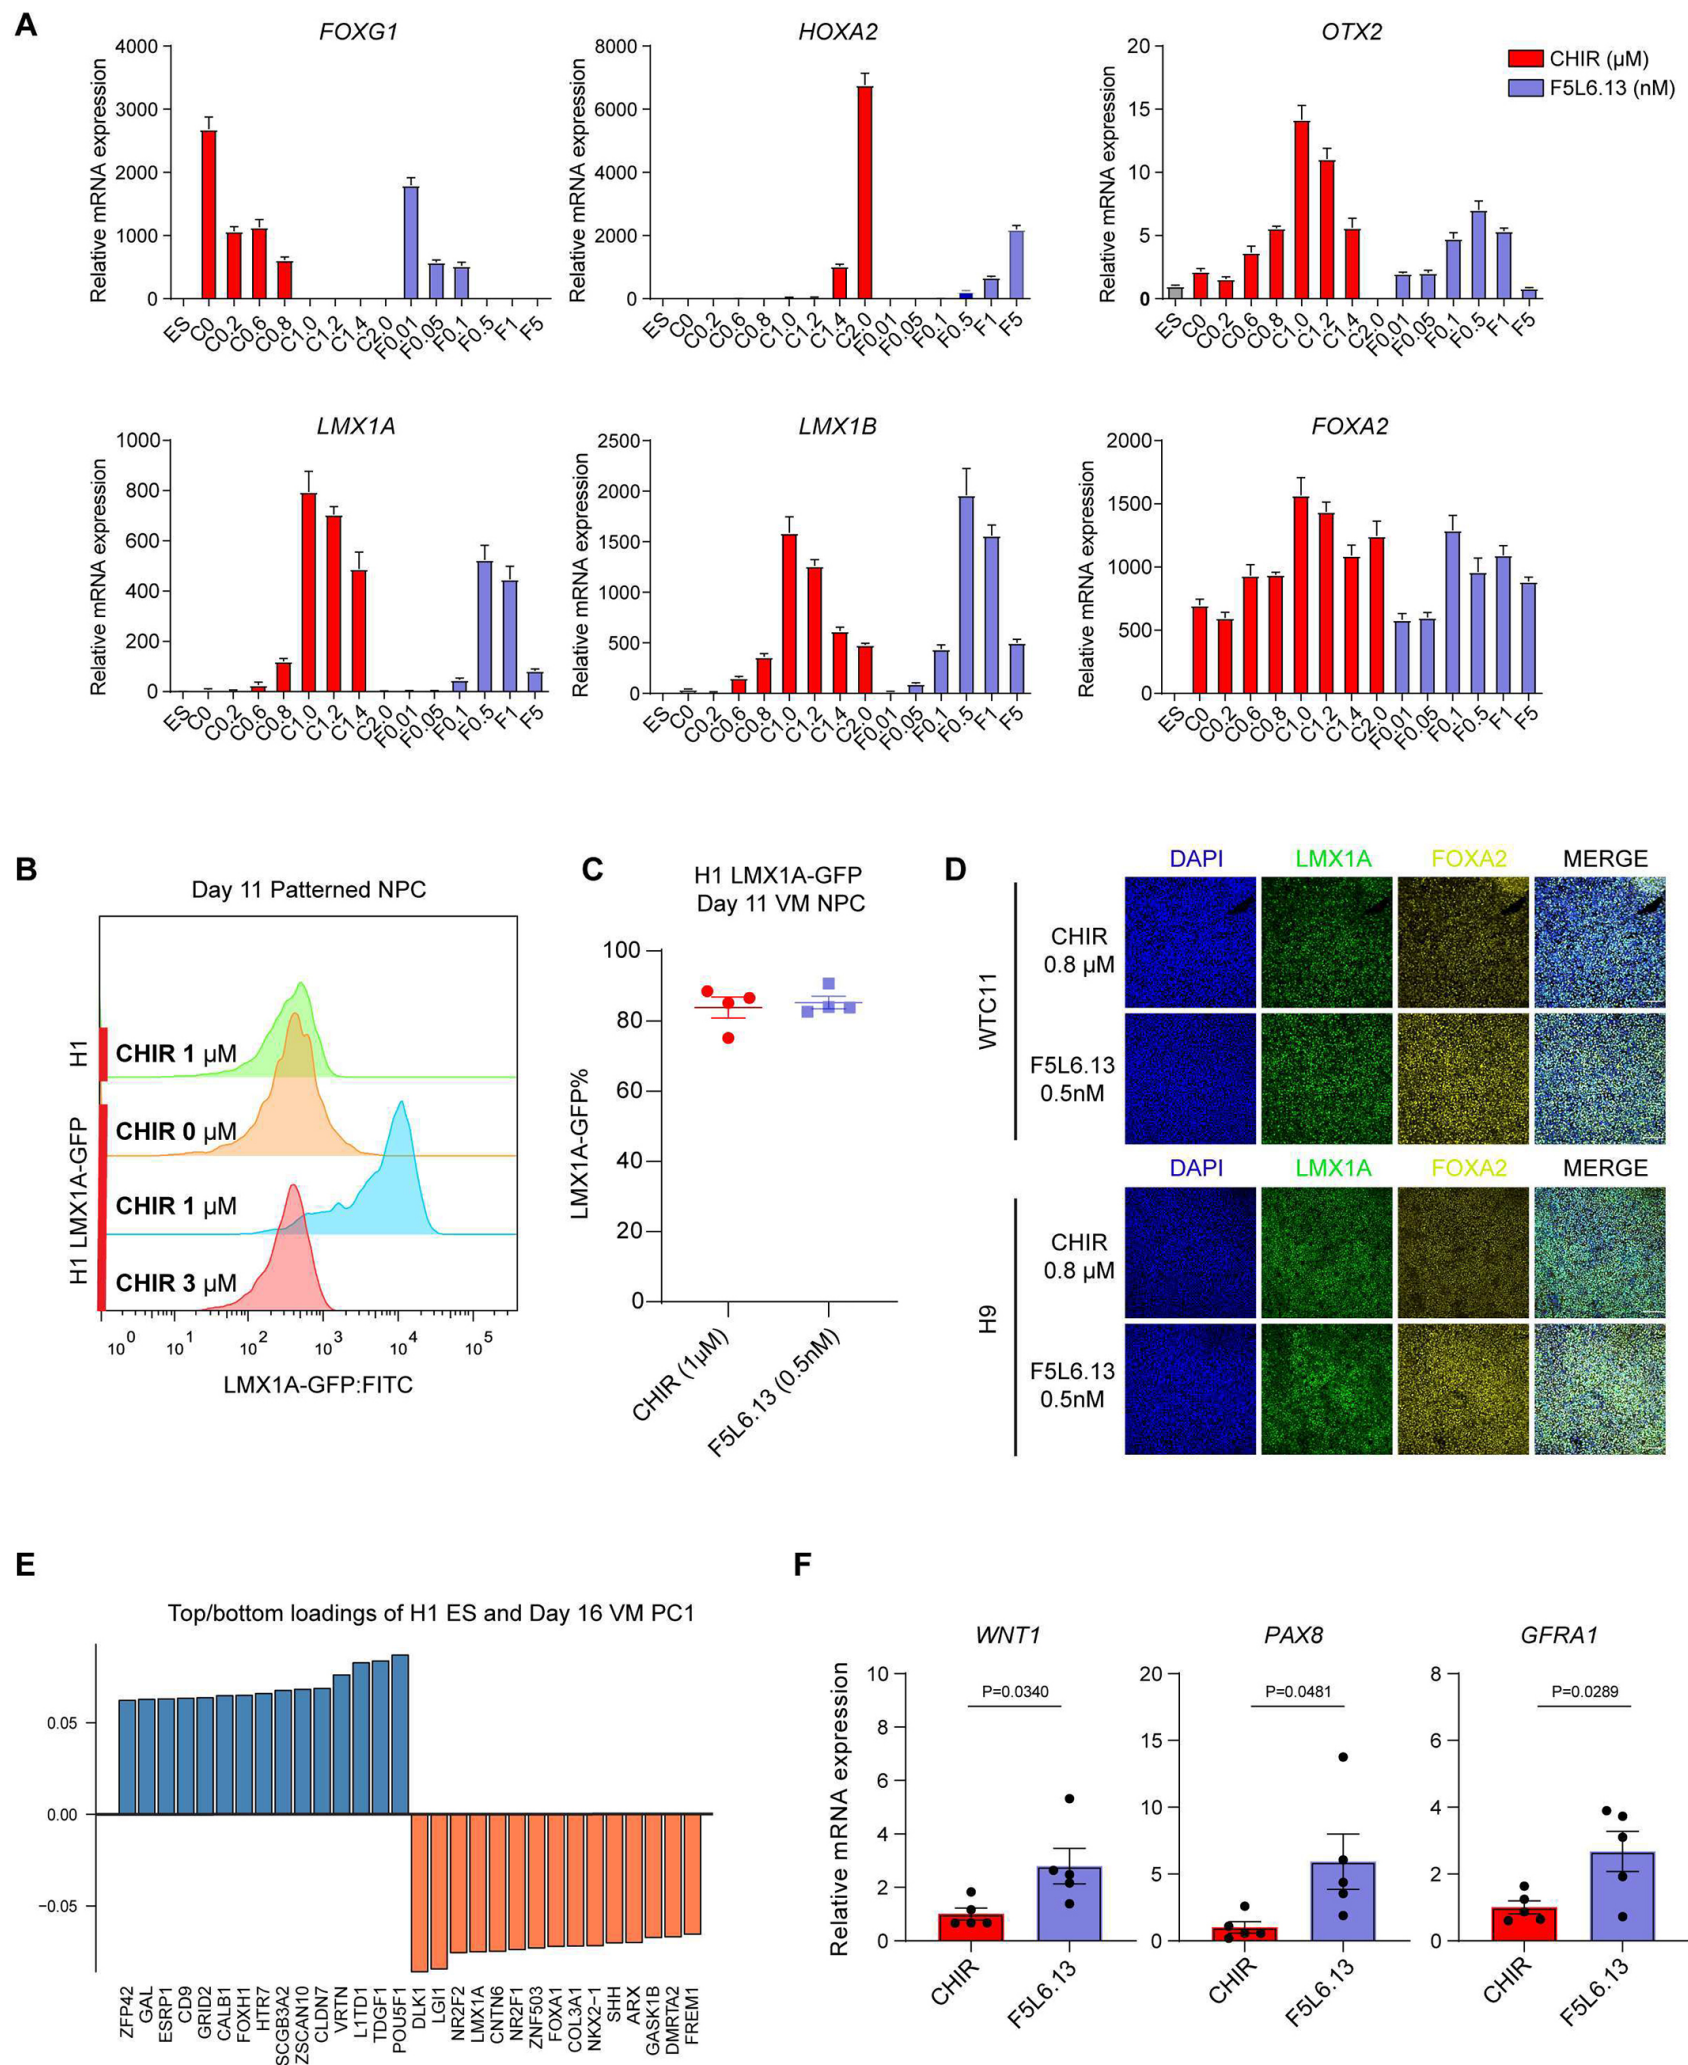

**Fig. S3. Related to Fig. 3.**

**A.** Dose response of CHIR99021 and F5L6.13 for neural patterning. The gene expression was normalized to the non-differentiated ES. Mean + s.d. of 3 technical replicates from 1 experiment. Representative of 3 independent experiments. **B.** Histogram of GFP expression in day 11 NPC differentiated in HI hESC parental line with 1  $\mu$ M CHIR9901 and HI hESC LMX I A-GFP reporter line with 0  $\mu$ M, 1  $\mu$ M or 3  $\mu$ M CHIR9901. Representative of 3 independent experiments. **C.** Percentage of LMX I A-GFP expressing cells differentiated from a HI hESC LMX I A-GFP Reporter line with 1  $\mu$ M CHIR99021 or 0.5 nM F5L6.13. Data are represented from 4 independent experiments. Mean  $\pm$  s.e.m. **D.** Immunostaining of VM markers LMX1A/FOXA2 at day 16 patterned from WTC11 hiPSC and H9 hESC. Images are representative of 3 independent experiments. Scale bar, 100  $\mu$ m. **E.** Top 15 gene loadings of PC I which explains the variance between the HI ESC and day 16 VM patterned NPC groups. **F.** qPCR gene expression of *PAX8*/*WNT1*/*GFRA1* at day 16 differentiated cells patterned with CHIR99021 or F5L6.13. Mean  $\pm$  s.e.m. n = 5 independent experiments, two-sided t-test. P-value are indicated on graph.



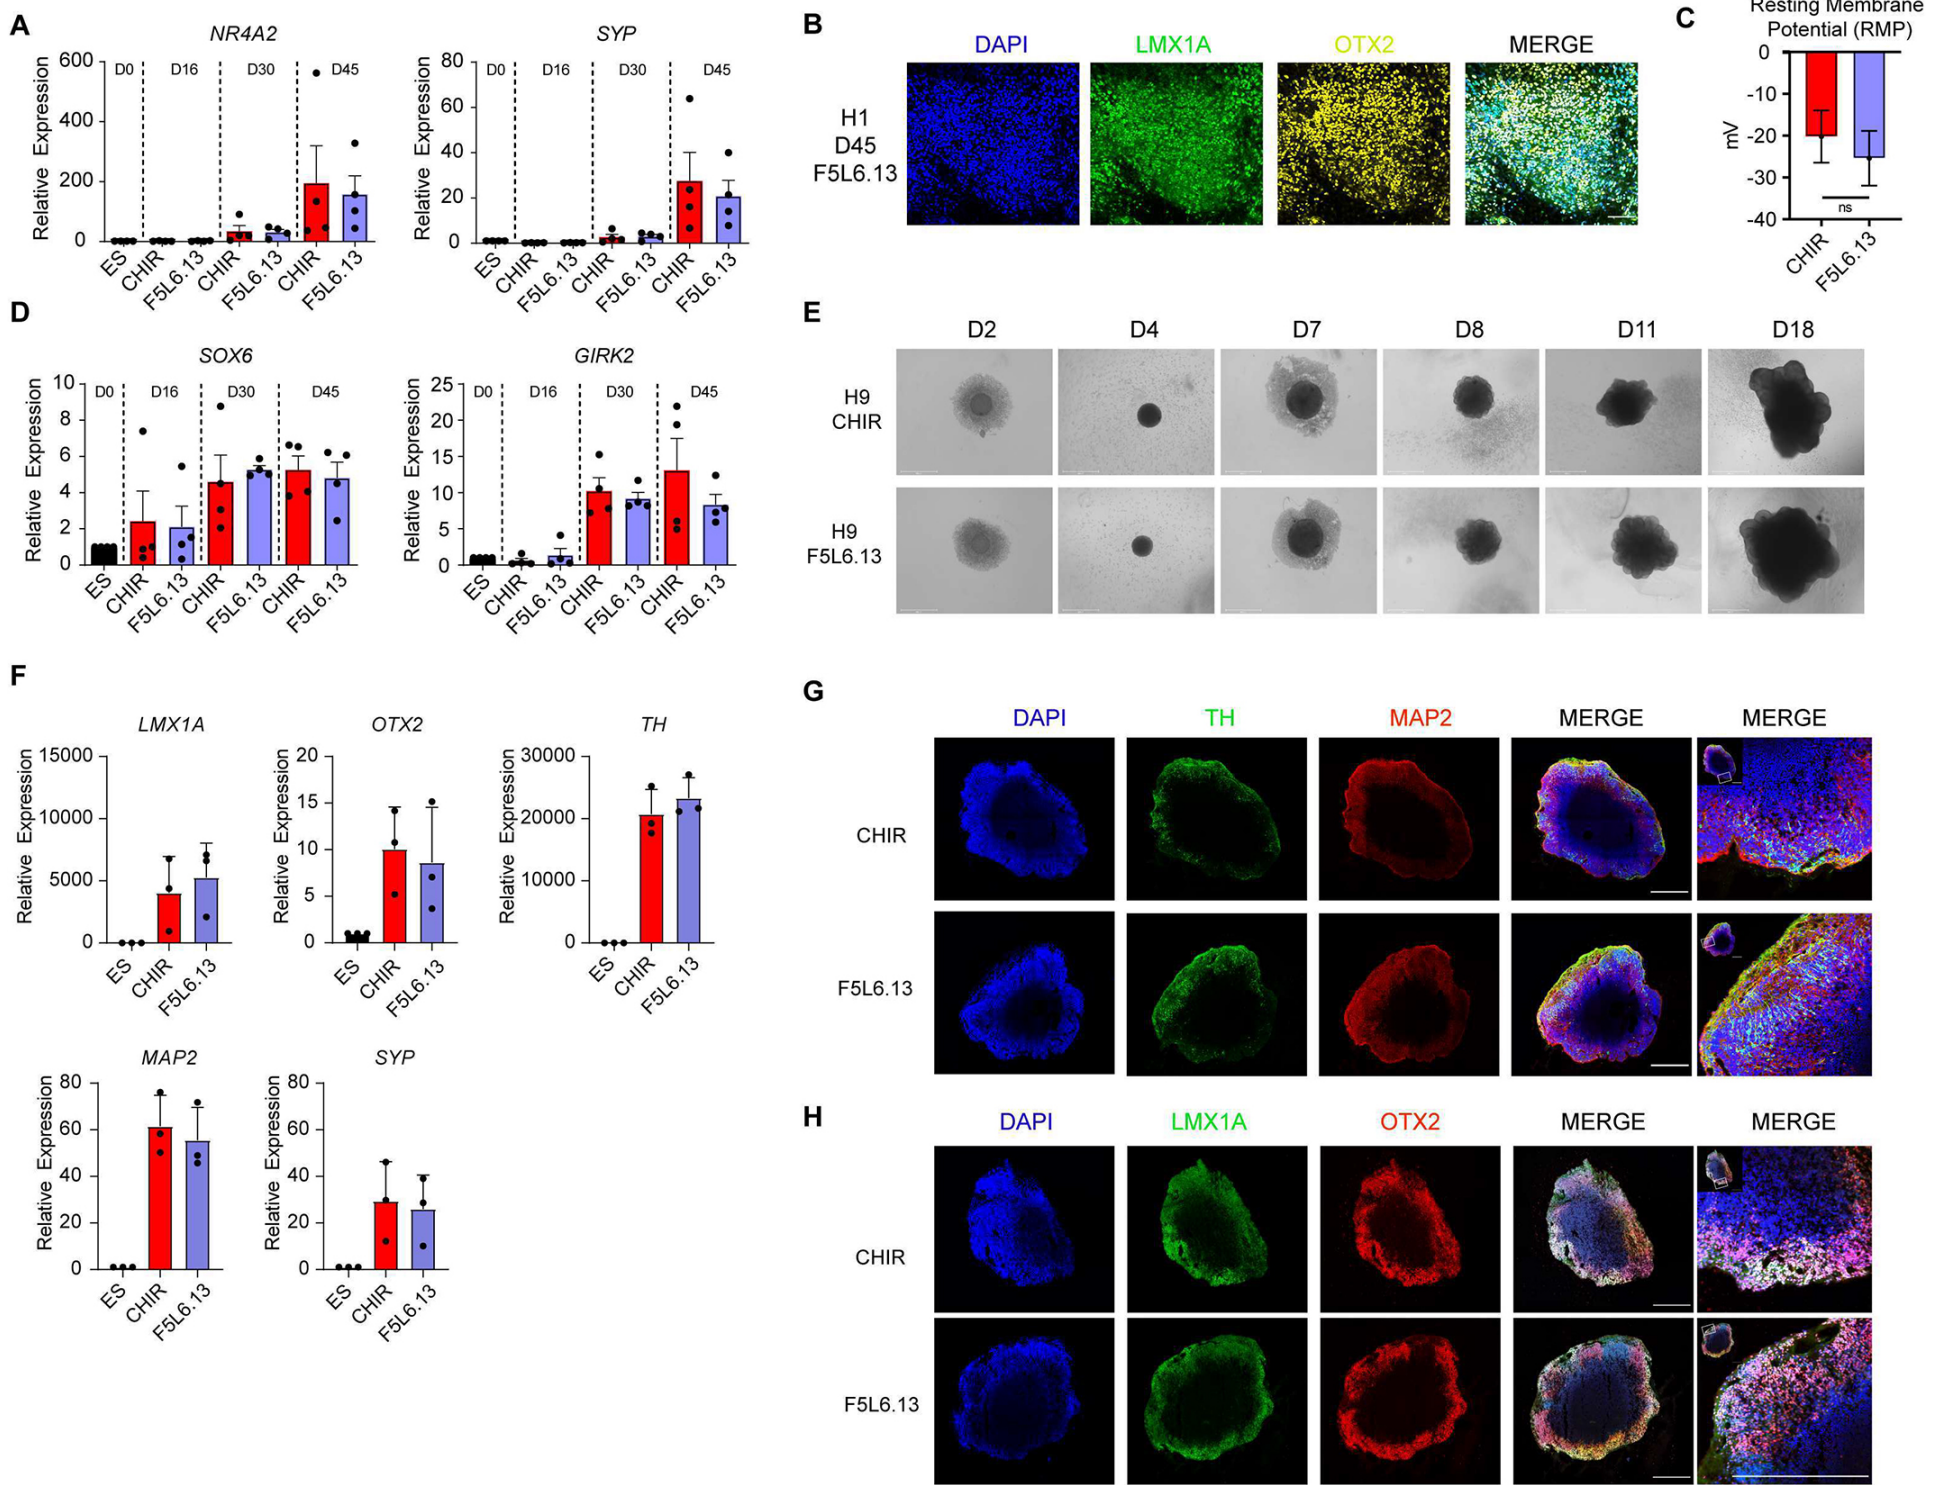

**Fig. S4. Related to Fig. 4.**

**A.** Time course qPCR gene expression of *NR4A2* and *SYP* in CHIR99021 or F5L6.13 patterned cells. Mean  $\pm$  s.e.m.  $n = 4$  independent experiments. **B.** Immunostaining of LMX IA/FOXA2 on D45 differentiated neuronal cultures from VM progenitors patterned with F5L6.13. Images are representative of 3 independent experiments. Scale bar, 100  $\mu\text{m}$ . **C.** Resting membrane potential of patched neurons from CHIR99021 and F5L6.13 patterned neuronal cultures. Mean  $\pm$  s.e.m.  $n = 9$  for CHIR99021,  $n = 13$  for F5L6.13. **D.** Time course qPCR gene expression of *SOX6* and *GIRK2* in CHIR99021 or F5L6.13 patterned cells. Mean  $\pm$  s.e.m.  $n = 4$  independent experiments. **E.** Phase contrast image of the midbrain organoids patterned from H9 hESC at the timepoints indicated. Images are representative of 3 independent experiments. Scale bar, 650  $\mu\text{m}$ . **F.** qPCR gene expression of *LMX1A*, *OTX2*, *TH*, *SYP*, and *MAP2* in D30 midbrain organoids patterned with 0.8  $\mu\text{M}$  CHIR9901 or 0.5 nM F5L6.13 in H9 hESC. Mean  $\pm$  s.e.m.  $n = 3$  independent experiments. **G.** Immunostaining of TH/MAP2 (N) LMX IA/OTX2 of D30 sectioned midbrain organoids patterned with 0.8  $\mu\text{M}$  CHIR9901 or 0.5 nM F5L6.13. Images are representative of 3 independent experiments. Scale bar, 500  $\mu\text{m}$ .



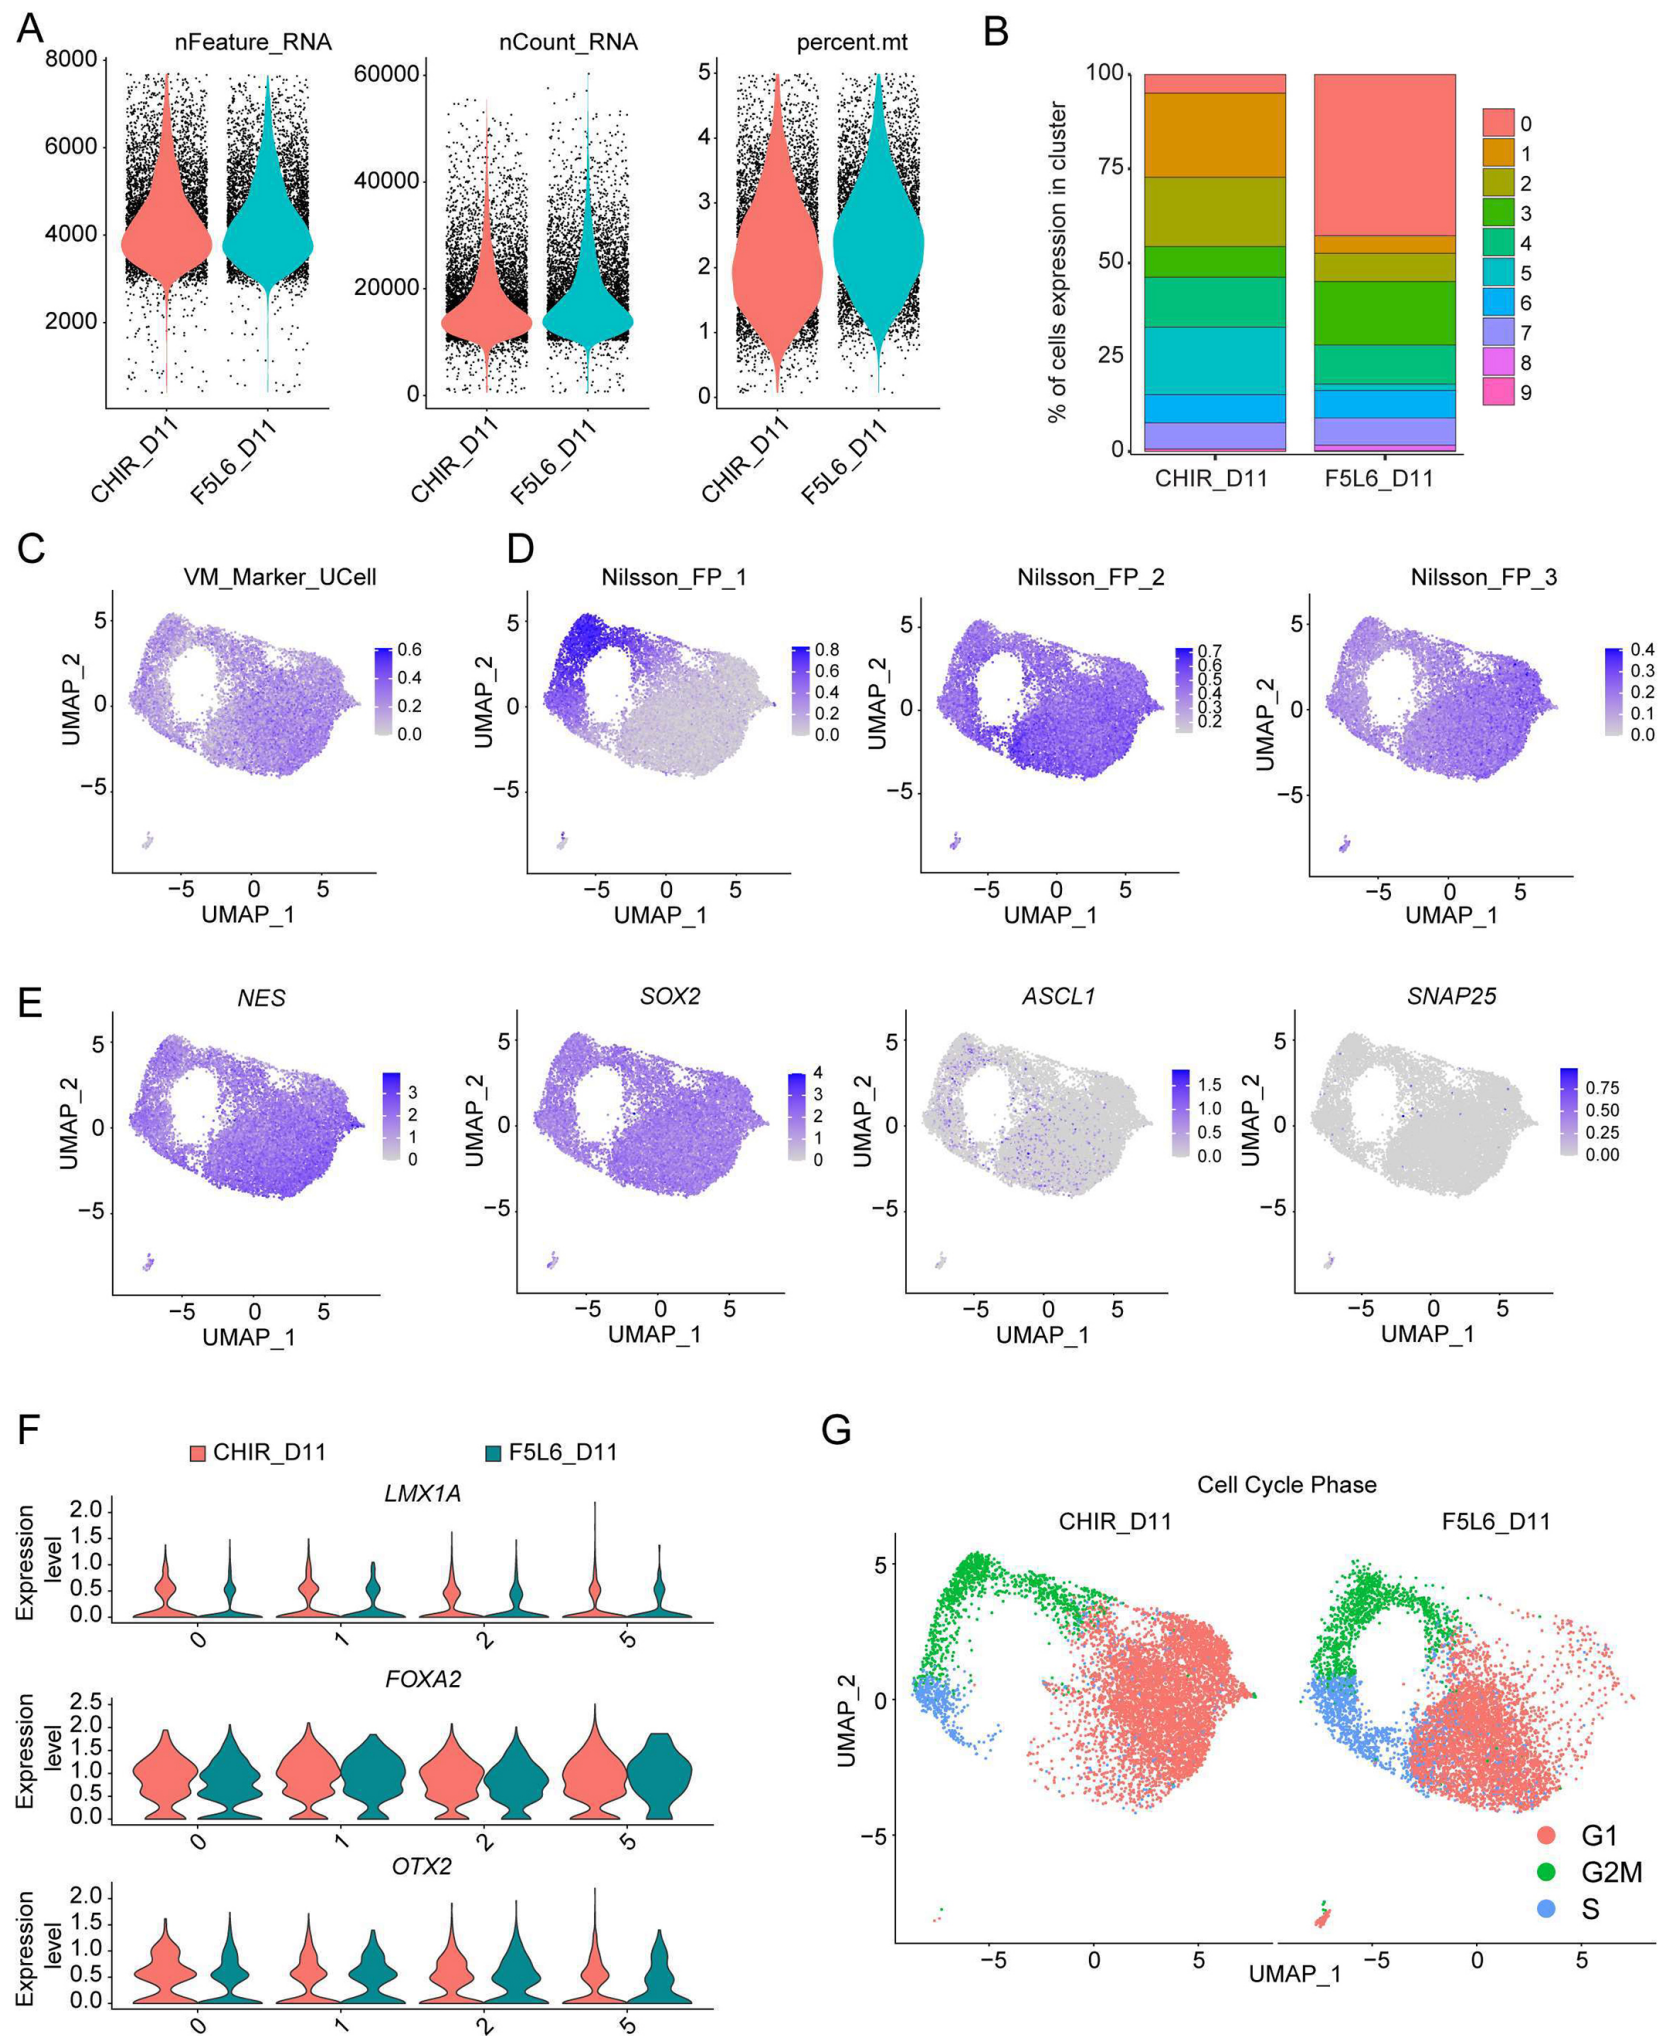

**Fig. S5. Related to Fig. 5.**

**A.** Violin plots displaying distribution of expression levels of feature counts, transcript counts and percentage of mitochondria genome across all cells after filtering. **B.** Proportion of clusters identified in each treatment condition. **C.** UCell scoring for simultaneous assessment of the expression level of several genes known for VM marker across all cells (See Table S3 for the list). Colored according to scaled expression by cell. **D.** UCell scoring for expression of genes representing distinct floor plate marker clusters identified from (Nilsson et al., 2021). Colored according to scaled expression by cell. **E.** Normalized expression levels of *NES*, *SOX2*, *ASCL1*, *SNAP25* superimposed onto the UMAPs. Colored according to expression levels by cell. **F.** Violin plots displaying distribution of expression levels of *LMX1A*, *FOXA2*, *OTX2* across clusters 0, 1, 2, 5 separated by treatment condition. **G.** UMAP plots showing the cell cycle status of the clusters separated by treatment conditions. G2M and S cell cycle status were classified using the function `CellCycleScoring` in the Seurat package.



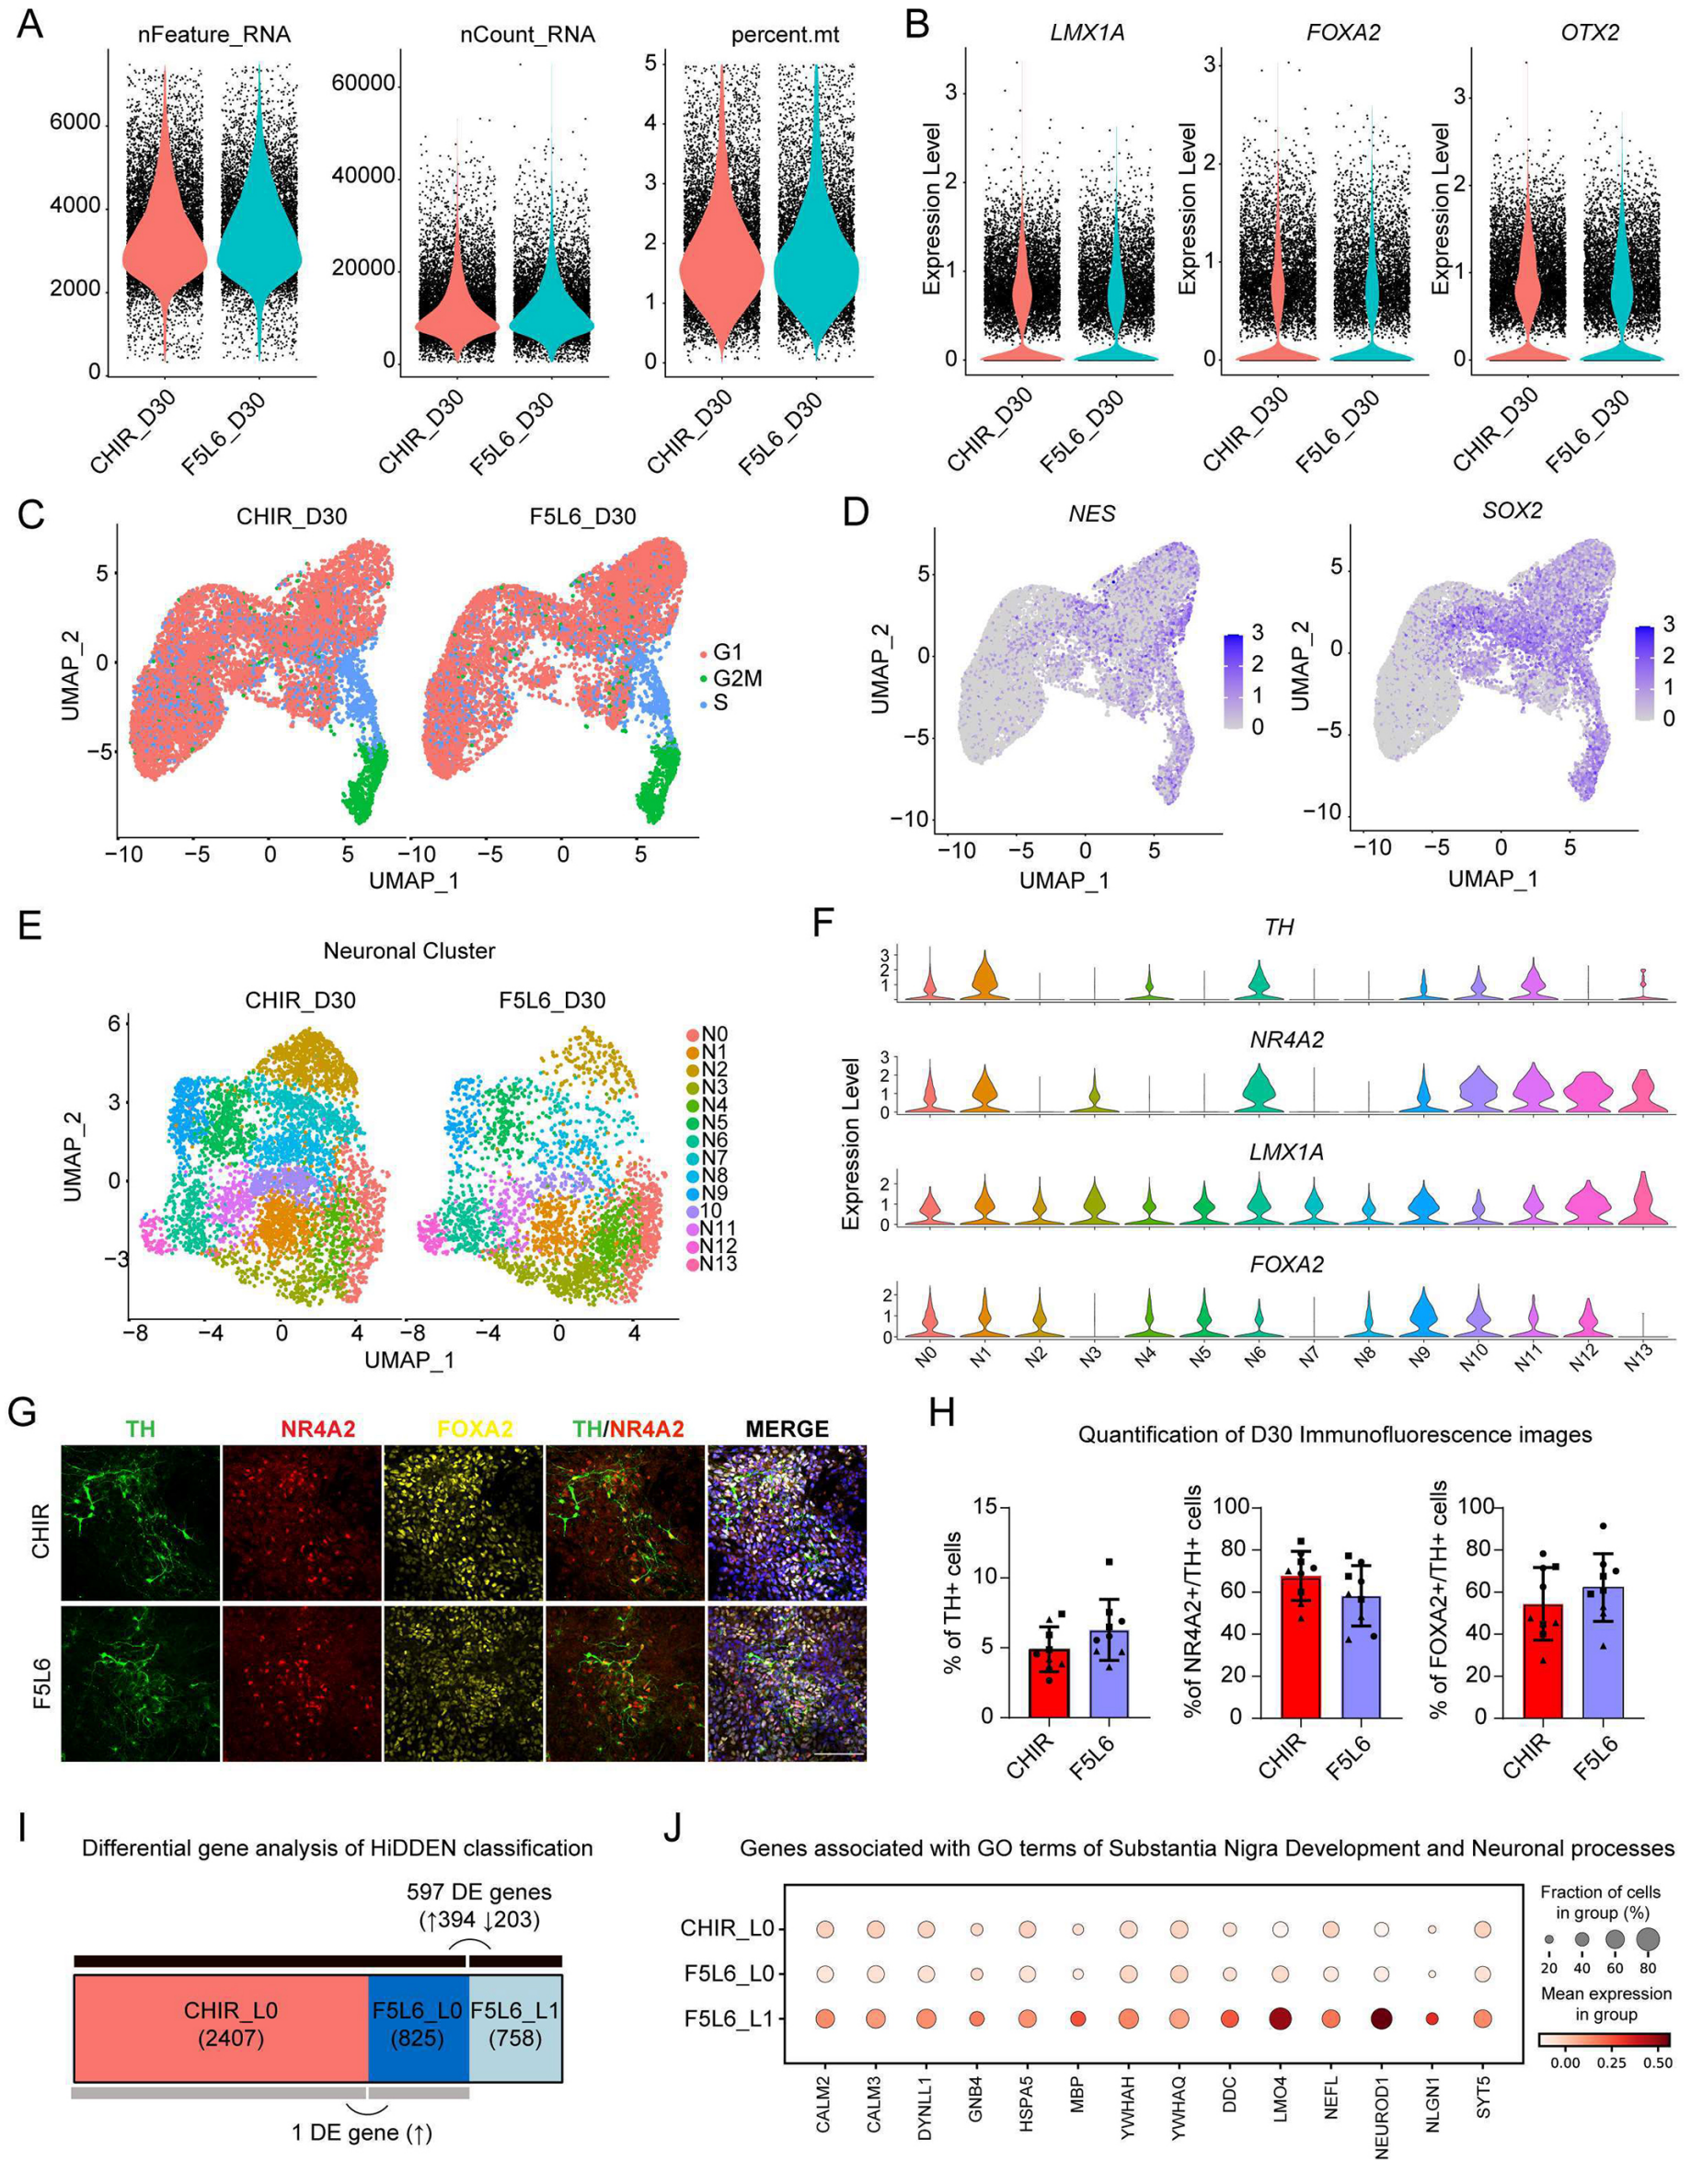



**Fig. S6. Related to Fig. 6.**

**A.** Violin plots displaying distribution of expression levels of feature counts, transcript counts and percentage of mitochondria genome across all cells after filtering. **B.** Violin plots displaying distribution of expression levels of *LMX J A/FOXA2/ OTX2* across all cells. **C.** UMAP plots showing the cell cycle status of the clusters separated by treatment conditions. **D.** Normalized expression levels of *NES* and *SOX2* superimposed onto the UMAPs. Colored according to expression levels by cell. **E.** UMAP plot showing the cell identity of treatment conditions contributing the subclustered neuronal population. **F.** Violin plots displaying distribution of expression levels of *TH*, *NR4A2*, *LMX JA*, and *FOXA2* in neuronal clusters. **G.** Immunostaining of TH/NR4A2/FOXA2 on day 30 differentiated neuronal cultures from VM progenitors patterned with CHIR99021 or F5L6.13. Scale bar, 100  $\mu$ m. **H.** Quantification of TH+ cells over DAPI nuclei staining, TH+ cells expressing NR4A2 and TH+ cells expressing FOXA2. Three images were taken at random locations per condition (represented by each symbol) and three independent experiments were used for counting. **I.** Schematic outlining the differential gene expression analysis from the HiDDEN clusters. **J.** Dot plot highlighting the genes associated to the gene ontology terms associated with substantia nigra development and neuronal processes across the HiDDEN clusters.



**Table S1.** Regulators of FZD5 cell surface expression in differentiated anterior neural progenitor cells identified in CRISPR screen.

| Positive Regulators |         |           |           |         |
|---------------------|---------|-----------|-----------|---------|
| FZD5                | PAN2    | AMER1     | KIF7      | EMC4    |
| FUT8                | SAP30   | TEAD1     | LCMT1     | GET4    |
| SLC35C1             | FZD7    | BAP1      | PDS5B     | VMA21   |
| CTNNBIP1            | USP46   | DET1      | FLII      | MSN     |
| AXIN1               | STK11   | PSIP1     | BRD2      | RERE    |
| DOT1L               | SUZ12   | MED24     | LBH       | CADPS2  |
| LDB1                | SIX3    | STRAP     | PHIP      | RIC8A   |
| PTK7                | AGO2    | SPTLC1    | OTX2      | NOB1    |
| MED12               | MED23   | MLLT1     | TM2D3     | SRP14   |
| PPP6C               | BRPF1   | TCF7L1    | EMC2      | MBTPS2  |
| MED25               | TSC2    | TSC1      | TP53      | PLCG1   |
| MED13L              | PCGF3   | JMJD6     | RALBP1    | GLTSCR2 |
| MED16               | EED     | SEC63     | PHF6      | SMARCC1 |
| KAT6A               | JTB     | IFT122    | TMOD3     | CHP1    |
| TGFBR2              | EMC1    | ZNF507    | AP1G1     | RHOA    |
| NHLRC2              | ZFAND2B | DDX3X     | MED15     | TEAD2   |
| PAXIP1              | SLC35B2 | MEN1      | SMARCD1   |         |
| MLLT10              | CIC     | C1GALT1C1 | TOE1      |         |
| MMGT1               | FXN     | RUNX1T1   | BAHD1     |         |
| Negative Regulators |         |           |           |         |
| PKDCC               | GREB1L  | RFX7      | PPIH      | RALGAPB |
| NF2                 | CBX5    | LATS2     | C19orf43  | DDX6    |
| DVL2                | PAX6    | STAM      | ARIH2     | NEDD4L  |
| CARM1               | DCP2    | SLMAP     | CCND2     | MYCN    |
| RAX                 | HECTD1  | HTT       | SCAF8     |         |
| RCOR2               | RPS6KA3 | STUB1     | EDC4      |         |
| SOX11               | ZEB2    | RBM26     | C20orf173 |         |
| HGS                 | GPC4    | MBD4      | UBE3B     |         |
| AP2S1               | SMARCA5 | E2F4      | IREB2     |         |
| SPOP                | TLE4    | FLCN      | UBTD2     |         |
| UBE2H               | SMG9    | NFKBIZ    | EDC3      |         |
| JARID2              | CDK13   | ZNF496    | SOX4      |         |
| FUS                 | ZMYND8  | BAZ1B     | CTNNB1    |         |
| RARA                | TAOK1   | KRAS      | CYP51A1   |         |

**Table S2.** Marker genes used for UCell scoring.

| VM_Marker | Nilsson_FP_1 | Nilsson_FP_2 | Nilsson_FP_3 |
|-----------|--------------|--------------|--------------|
| LMX1A     | HMGB2        | DLK1         | ABCA8        |
| LMX1B     | UBE2C        | MDK          | CMTM8        |
| FOXA2     | CENPF        | TPBG         | SULF1        |
| OTX2      | HISTIH4C     | SDC2         | TFF3         |
| SHH       | PTTG1        | VIM          | IGFBP2       |
| CORN      | PCLAF        | COL1A2       | SPON1        |
|           | TOP2A        | CCND1        | RFX4         |
|           | CKS1B        | FABP7        | XBP1         |
|           | NUSAP1       | RCN1         | CMTM7        |
|           | SMC4         | PITX2        | IGDCC3       |

**Table S3.** Differential expressed genes identified comparing label 0 to label 1 of DA neurons in HiDDEN analysis, related in Figure 6.

Label 0 upregulated:

|            |           |          |          |            |        |        |
|------------|-----------|----------|----------|------------|--------|--------|
| DMRTA2     | LMO3      | ZFH3     | TLE4     | DLK1       | FTH1   | RPS8   |
| APP        | RPL11     | PTPRO    | RPS13    | PLXDC2     | RND3   | RPL10  |
| RPL37A     | RPL13A    | RPS11    | RPS3A    | RPS14      | RPL9   | RPL22  |
| RPL18A     | RPS15A    | RPL21    | RPL7     | RPS27      | RPL27A | IGFBP2 |
| RPL3       | RPL6      | RPL32    | RPL18    | EEF1G      | RPL15  | RPL28  |
| ADCYAP1    | NOVA1     | RPS19    | RPL3     | RPL6       | RPL32  | RPL18  |
| NACA       | RPL37     | HMG1     | TH       | MIR99AHG   | RPL36  | RPS16  |
| FAT3       | LINC00461 | PPP1R14B | SOX2-OT  | TRIM9      | TOMM7  | ZFH4   |
| RPS18      | HNRNPC    | DCC      | SPOCK1   | RPL7A      | RPL35A | PCSK2  |
| RPS6       | SLITRK6   | ATP5F1E  | RPLP0    | RACK1      | NR2F2  | ALCAM  |
| NCALD      | RPS9      | RPL30    | SLC39A10 | ZNF503     | RPL26  | RPL4   |
| PKIB       | RPL31     | TUBA1B   | SOX11    | NEDD4L     | PIK3R1 | EIF3L  |
| NREP       | VKORC1    | RPL29    | ANKRD12  | NTM        | HES6   | RPS5   |
| TPBG       | YBX1      | NUCKS1   | RPL36A   | AL049637.2 | TAGLN2 | GULP1  |
| MTPN       | MINDY2    | CHL1     | RPS15    | RPL19      | CHN2   | DAAM1  |
| AP000894.2 | EIF3E     | COX7C    | QDPR     | FUT8       | LBH    | ROBO1  |
| STARD4-AS1 | RPS21     | DDX46    | FXR1     | CUX1       | DCBLD2 | RPL10A |
| PDZRN4     | SEZ6L     | SNHG29   | RMST     | NECAB1     | RPL14  | SKA2   |
| CTCF       | SLC2A13   | FTL      | PABPC1   | C21orf62   | PFN2   | OTX2   |
| EPHA4      | RPL41     | NTN1     | EIF3F    | RTF1       | RPS7   | HMG2   |
| PTTG1IP    | FAM110B   | ZNF292   | SSH2     | PITX2      | HS3ST5 | POSTN  |
| PLS3       | NPAS3     | RPL13    | EEF1A1   | RPL5       | TUBB   | NR4A2  |
| CHD4       | CAMK2N1   | RPS12    | RPL34    | RPS27A     | SOX2   | RPL17  |
| DDX5       | TMA7      | RPS4X    | RPS23    | TPT1       | PCDH17 | WASF3  |
| CKB        | RPL8      | ADCYAP1  | NOVA1    | RPS19      | CIRBP  | IGFBP5 |
| TUBB3      | RPS10     | NACA     | RPL37    | HMG1       | CADM1  | CHD7   |
| SLIT2      | FBNPIL    | EEF1G    | RPL15    | RPL28      | CELF4  | PAWR   |
| GNAI2      | GDAP1L1   | RPL38    | RPS24    | RPLP2      | PON2   | STMN1  |
| SVBP       | POU3F2    | LRRC4C   | REEP1    | RPL39      | RPSA   | PFDN5  |
| RPS17      | RPL23A    | RPL23    | ACTG1    | CXXC4      | OBI1   | DIPK2A |
| RPS29      | RPS28     |          |          |            |        |        |

Label 1 upregulated:

|          |          |             |         |          |           |            |
|----------|----------|-------------|---------|----------|-----------|------------|
| CRNDE    | IRX3     | LMO4        | NEUROD1 | RALYL    | SSBP2     | EPHA5      |
| PTPRN    | BTBD3    | NR2F1       | TPH1    | SCG2     | FOXP2     | AC010247.2 |
| SYT13    | MAP1LC3A | LIMCH1      | C1GALT1 | PCSK1    | RPLP1     | MAB21L1    |
| DACH1    | VGF      | DUSP4       | SEPTIN6 | BEX3     | EPHA5-AS1 | RXRG       |
| DDC      | TENM1    | PTPRK       | TMSB10  | GRIN2B   | RUNX1T1   | NLGN1      |
| PAM      | CASC15   | MBP         | CYSTM1  | BEX5     | CYCS      | BEX1       |
| LNPCK    | AFF3     | NEFM        | MAD1L1  | NRXN1    | ATP6V0C   | VAT1       |
| CPE      | SARAF    | LUZP2       | STXBP1  | WNT4     | PRKACB    | SEC11C     |
| ELAVL2   | DNAJA1   | ANKRD29     | ONECUT3 | TCEAL5   | RGMA      | FIGN       |
| TMSB4X   | RTN4     | ELL2        | FOS     | HSP90B1  | VIM       | ID2        |
| NEFL     | GLRX     | ATP1A3      | LRRC3B  | HSPE1    | COTL1     | DOK5       |
| PKIA     | HTR2A    | GNAI1       | IGFBP1  | BCL11A   | ARMCX3    | SYAP1      |
| BMERB1   | BEX2     | SHC4        | TSC22D3 | TRAPPC5  | TXN       | AKAP7      |
| PDE10A   | TLE2     | AKAP12      | SOX4    | GSTM3    | CENPV     | GNAL       |
| YWHAH    | TRA2B    | QKI         | BAALC   | PLD3     | AAK1      | UNCX       |
| NDUFB8   | UBE2QL1  | NME1        | COX8A   | ARID5B   | TSPYL4    | ARMH4      |
| GNG4     | DYNLL1   | FNDC5       | GNB4    | EIF5     | TTC39C    | CLTC       |
| CNST     | PPA1     | SRGAP3      | GABBR2  | MAP4K5   | SIK3      | PDHA1      |
| CRYBG3   | CDKN2D   | UBL3        | STMN2   | COX7B    | MBNL2     | CTNNA2     |
| NCS1     | PITPNC1  | SGIP1       | MORF4L2 | GNG3     | DSTN      | RPS26      |
| ANK2     | ATP6V0E2 | GRM7        | SPAG9   | KCNIP4   | CRIM1     | SEMA3A     |
| HSPA8    | DGKD     | SYT5        | HMG1    | PARD6A   | RANGAP1   | SCOC       |
| GNB2     | KCNJ6    | ATP1B3      | LYPD1   | CAST     | MGAT4C    | MICOS13    |
| TLK1     | SEMA6A   | PJA2        | ARPC5   | CHML     | SNRPB     | MAL2       |
| ATP5MC1  | NSG2     | CCDC184     | CNTNAP5 | PTPRD    | SAT2      | YWHAQ      |
| PTMA     | NRIP3    | SEPTIN11    | USP48   | HSPD1    | BLOC1S1   | SNHG8      |
| MAP2     | RTN1     | DDX21       | SELENOK | KLHL35   | MLLT3     | KCNMA1     |
| TES      | RAB10    | ARG2        | EML6    | ATP1A1   | CYC1      | REEP5      |
| RAB9B    | SLC22A17 | ANK3        | LONRF2  | HSPH1    | COX7A2    | RND2       |
| FGF12    | CALY     | SH3KBP1     | GLIS3   | S100A    | PHLDA1    | IRX5       |
| SNAP25   | ID4      | EPS15       | CSRP2   | TUNAR    | SPCS2     | ARX        |
| CNR1     | OSBPL1A  | KIF21A      | DCLK1   | JAK1     | PLXNA4    | SLC7A8     |
| CARTPT   | TBCA     | DMAC1       | POU2F2  | ASPHD1   | TCEAL7    | NUCB2      |
| CNTNAP3B | NPTX1    | TMEM132B    | AFF2    | SFMBT2   | CALB1     | HPGD       |
| PROX1    | ITPRID2  | PPFIA2      | EIF1    | UCHL1    | KPNA2     | PRKAR1A    |
| FTO      | MARK1    | ADGRL2      | CALR    | NDUFA13  | ITGB1     | CDH8       |
| POU6F2   | CASK     | PALM2-AKAP2 | PCDH10  | ATP6V1G1 | RGS7      | PCB        |
| CHD5     | MTURN    | IGSF21      | GALNTL6 | NDUFA5   | NAV3      |            |



**Table S4.** List of qPCR primers used in this study.

| <b>Oligo Name</b> | <b>Sequence (5' to 3')</b> |
|-------------------|----------------------------|
| FOXA2.qPCR.Fwd    | CCGTTCTCCATCAACAACCT       |
| FOXA2.qPCR.Rev    | GGGGTAGTGCATCACCTGTT       |
| FOXG1.qPCR.Fwd    | AGAAGAACGGCAAGTACGAGA      |
| FOXG1.qPCR.Rev    | TGTTGAGGGACAGATTGTGGC      |
| FZD5.qPCR.Fwd     | ACACCCGCTCTACAACAAGG       |
| FZD5.qPCR.Rev     | CTCAGGATAGCGGAAGCGTT       |
| GFRA1.qPCR.Fwd    | GAACCCCTAAAAGCGGAACC       |
| GFRA1.qPCR.Rev    | TCAGCTCCATCCAGTGAAAG       |
| HOXA2.qPCR.Fwd    | CGTCGCTCGCTGAGTGCCTG       |
| HOXA2.qPCR.Rev    | TGTCGAGTGTGAAAGCGTCGAGG    |
| LMX1A.qPCR.Fwd    | CGCATCGTTTCTTCTCCTCT       |
| LMX1A.qPCR.Rev    | CAGACAGACTTGGGGCTCAC       |
| LMX1B.qPCR.Fwd    | CTTAACCAGCCTCAGCGACT       |
| LMX1B.qPCR.Rev    | TCAGGAGGCGAAGTAGGAAC       |
| MAP2.qPCR.Fwd     | CCGTGTGGACCATGGGGCTG       |
| MAP2.qPCR.Rev     | GTCGTCGGGGTGATGCCACG       |
| OTX2.qPCR.Fwd     | ACAAGTGGCCAATTCCTCC        |
| OTX2.qPCR.Rev     | GAGGTGGACAAGGGATCTGA       |
| PAX8.qPCR.Fwd     | ATAGCTGCCGACTAAGCATTGA     |
| PAX8.qPCR.Rev     | ATCCGTGCGAAGGTGCTTT        |
| PPIB.qPCR.Fwd     | GGAGATGGCACAGGAGGAA        |
| PPIB.qPCR.Rev     | GCCCGTAGTGCTTCAGTTT        |
| SYP.qPCR.Fwd      | ACCTCGGGACTCAACACCTCGG     |
| SYP.qPCR.Rev      | GAACCACAGGTTGCCGACCCAG     |
| TH.qPCR.Fwd       | CGGGCTTCTCGGACCAGGTGTA     |
| TH.qPCR.Rev       | CTCCTCGGCGGTGTACTCCACA     |
| WNT1.qPCR.Fwd     | GAGCCACGAGTTTGGATGTT       |
| WNT1.qPCR.Rev     | TGCAGGGAGAAAGGAGAGAA       |
| NR4A2.qPCR.Fwd    | CAGGCGTTTTTCGAGGAAAT       |
| NR4A2.qPCR.Rev    | GAGACGCGGAGA ACTCCTAA      |
| SYP.qPCR.Fwd      | ACCTCGGGACTCAACACCTCGG     |
| SYP.qPCR.Rev      | GAACCACAGGTTGCCGACCCAG     |
| SOX6.qPCR.Fwd     | AGGGAGTCTTGCCGATGTG        |
| SOX6.qPCR.Rev     | CAGGCTCTCAGGTGTACCTTTA     |
| GIRK2.qPCR.Fwd    | CACATCAGCCGAGATCGGAC       |
| GIRK2.qPCR.Rev    | GGTAGCGATAGGTCTCCCTCA      |
| MAP2.qPCR.Fwd     | CCGTGTGGACCATGGGGCTG       |
| MAP2.qPCR.Rev     | GTCGTCGGGGTGATGCCACG       |



**Table S5.** List of PCR primers and gRNA sequences used in this study.

## CRISPR-Cas9 Knockout

| gRNA Targeting | gRNA sequence         |
|----------------|-----------------------|
| AAVS1          | GGGGCCACTAGGGACAGGAT  |
| OTX2_g1        | GGAGAGGACGACGTTCCTC   |
| OTX2_g2        | AAATCAACTTGCCCGAGTCG  |
| LDB1_g1        | GTGGTCGGAGACTCACTCGG  |
| LDB1_g2        | GAGATGCTGCGGAAGTAGCGT |

## TIDE PCR primers

|         | TIDE PCR FWD Primer  | TIDE PCR REV Primer  |
|---------|----------------------|----------------------|
| AAVS1   | CCTGTCATGGCATCTTCCAG | CAAGTCTCCCTCCCAGGAT  |
| OTX2_g1 | GATGGAGGAACAAAGGCCCA | ATTAAGTGGTGACGGGCAGG |
| OTX2_g2 | GATGGAGGAACAAAGGCCCA | ATTAAGTGGTGACGGGCAGG |
| LDB1_g1 | TCCTTGCCATGCATGTGAGT | CCCAGGTCCCCTATTCTCCA |
| LDB1_g2 | AGGCACACACCATATGGCAA | CACTGGGAGAGAGGATGGGA |

## TIDE Sequencing Primers

|         | TIDE Sequencing Primer   |
|---------|--------------------------|
| AAVS1   | CTATGTCCACTTCAGGACAGCATG |
| OTX2_g1 | GGCAGAAGGAGAATAGTTTCC    |
| OTX2_g2 | GGCAGAAGGAGAATAGTTTCC    |
| LDB1_g1 | GTGGGGAAAACCTCAAAGG      |
| LDB1_g2 | GCCCTTCTTATTTGCCAGT      |

## Homology Arm PCR Primers

|                 | Sequences           |
|-----------------|---------------------|
| LMX1A LHA - FWD | TGAAGGTAGGCACCTAACC |
| LMX1A LHA - REV | CTCCTGGACGTAGCCTTC  |
| LMX1A RHA - FWD | TCCATACCGACGATCTGCG |
| LMX1A RHA - REV | GCAGATGCTGAAGCTCAAG |

## Nickase Sequences

|           | Sequences            |
|-----------|----------------------|
| Nickase 1 | CTAGAGTTCTGTGACTAGGC |
| Nickase 2 | CATATTCTTTGAGGGGTCAC |



**Table S6.** List of antibodies used in this study.

| <b>Primary Antibody</b>                                                                | <b>Antibody Cat No.</b> | <b>Species</b> | <b>Dilution</b> |
|----------------------------------------------------------------------------------------|-------------------------|----------------|-----------------|
| FOXG1                                                                                  | Abcam (ab18259)         | Rabbit         | 1:400           |
| LMX1A                                                                                  | Millipore AB10533       | Rabbit         | 1:1000          |
| TH                                                                                     | Pel-Freeze P40101-150   | Rabbit         | 1:500           |
| TH                                                                                     | Millipore AB152         | Rabbit         | 1:1000          |
| FOXA2                                                                                  | R&D Systems AF2400      | Goat           | 1:1000          |
| OTX2                                                                                   | R&D Systems AF1979      | Goat           | 1:1000          |
| EN1                                                                                    | DSHB 4GII               | Mouse          | 1:20            |
| MAP2                                                                                   | ThermoFisher (13-1500)  | Mouse          | 1:500           |
| TUBB3                                                                                  | ThermoFisher (MA1-118)  | Mouse          | 1:500           |
| hNCAM                                                                                  | Santa Cruz sc-106       | Mouse          | 1:500           |
| NR4A2                                                                                  | ThermoFisher (MA1-195)  | Mouse          | 1:1000          |
| <b>Secondary Antibody</b>                                                              | <b>Antibody Cat No.</b> | <b>Species</b> | <b>Dilution</b> |
| Donkey anti-Rabbit IgG (H+L) Highly Cross-Adsorbed Secondary Antibody, Alexa Fluor 488 | ThermoFisher (A-21206)  | Donkey         | 1:250           |
| Donkey anti-Mouse IgG (H+L) Highly Cross-Adsorbed Secondary Antibody, Alexa Fluor 594  | ThermoFisher (A-21203)  | Donkey         | 1:250           |
| Donkey anti-Goat IgG (H+L) Cross-Adsorbed Secondary Antibody, Alexa Fluor 647          | ThermoFisher (A-21447)  | Donkey         | 1:500           |
| Goat anti-Mouse IgG (H+L) Cross-Adsorbed Secondary Antibody, Alexa Fluor™ 488          | ThermoFisher (A-11001)  | Goat           | 1:500           |
| Goat anti-Mouse IgG (H+L) Cross-Adsorbed Secondary Antibody, Alexa Fluor 568           | ThermoFisher (A-11004)  | Goat           | 1:500           |
